# 1 **Impact of Adverse Drug Reactions in the outcomes of Tuberculosis** 2 **Treatment**

3 **Short Title: Drug reactions in anti-TB therapy**

4 **Flávia M. Sant´Anna<sup>1,2#</sup>, Mariana Araújo-Pereira<sup>3,4,5#</sup>, Carolina A. S. Schmaltz<sup>2#</sup>, María B.**  
5 **Arriaga<sup>3,4,5#</sup>, Bruno B. Andrade<sup>3,4,5,6,7\*</sup>, Valeria C. Rolla<sup>1,2\*</sup>**

6

7 <sup>1</sup>Postgraduate Program Clinical Research in Infectious Diseases, National Institute of Infectious  
8 Diseases Evandro Chagas, Oswaldo Cruz Foundation, Rio de Janeiro, Brazil

9 <sup>2</sup>Clinical Research Laboratory on Mycobacteria, (LAPCLIN-TB), National Institute of Infectious  
10 Diseases Evandro Chagas, Oswaldo Cruz Foundation, Rio de Janeiro, Brazil

11 <sup>3</sup>School of Medicine, Federal University of Bahia, Salvador, Brazil

12 <sup>4</sup>Multinational Organization Network Sponsoring Translational and Epidemiological Research  
13 (MONSTER) Initiative, Salvador, Brazil

14 <sup>5</sup>Laboratory of Inflammation and Biomarkers, Gonçalo Moniz Institute, Oswaldo Cruz Foundation,  
15 Salvador, Brazil

16 <sup>6</sup>Curso de Medicina, Escola Bahiana de Medicina e Saúde Pública (EBMSP), Salvador, Brazil

17 <sup>7</sup>Curso de Medicina, Universidade Salvador (UNIFACS), Laureate Universities, Salvador, Brazil

18

19 <sup>#</sup>Flávia M. Sant´Anna, Mariana Araújo-Pereira, Carolina A. S. Schmaltz and María B. Arriaga  
20 equally contributed to the work.

21

22 <sup>\*</sup>The senior authors Bruno B. Andrade and Valeria C Rolla equally contributed to the work.

23

24 **\* Correspondence:** Bruno B. Andrade, MD, PhD. Laboratory of Inflammation and Biomarkers,  
25 Gonçalo Moniz Institute, Oswaldo Cruz Foundation, Rua Waldemar Falcao, 121, Candeal, Salvador,  
26 Bahia 40296-710, Brazil. E-mail: Bruno.andrade@fiocruz.br.

27 **Keywords: tuberculosis, tuberculosis treatment, adverse drug reaction, treatment outcomes,**  
28 **loss to follow up.**

29

30 **ABSTRACT**

31 Adverse drug reactions (ADR) challenge successful anti-tuberculosis treatment (ATT). The aim of this  
32 study was to evaluate the impact of ATT-associated ADR and related factors on treatment outcomes.  
33 A prospective cohort study of persons with tuberculosis at a referral center in Rio de Janeiro, Brazil,  
34 from 2010 to 2016. ADRs, favorable (cure and treatment completion) and unfavorable (death, loss to  
35 follow up and failure) outcomes were prospectively captured. The Kaplan-Meier curve was used to  
36 estimate probability ADR-free time. A logistic regression model was performed to identify  
37 independent associations with unfavorable outcomes. 550 patients were enrolled and 35.1% were  
38 people living with HIV (PLHIV). ADR occurred in 78.6% of participants and was associated with  
39 favorable outcomes. Smokers (OR:2.32;95%CI:1.34-3.99) and illicit drug users  
40 (OR:2.02;95%CI:1.15-3.55) exhibited higher risk of unfavorable outcome. PLHIV more frequently  
41 experienced grade 3/4-ADR, specially “liver and biliary system disorders”. Lower CD4 counts were  
42 associated with hepatotoxicity (p=0.03). Male sex, low schooling, smoking and illicit-drug use are  
43 independent risk factors for unfavorable outcomes, as well alcohol abuse and previous ART in PLHIV.  
44 ADR increases the odds of favorable outcomes, although it is more severe in PLHIV and related to a  
45 higher risk of hepatotoxicity.

## 46 **Introduction**

47 Anti-tuberculosis treatment (ATT) has been available worldwide and can reach more than 90% of  
48 effectiveness [1]. However, the challenges in achieving this goal persist as ATT can cause adverse drug  
49 reactions (ADR) that lead to increased morbidity and compromise adherence eventually contributing  
50 to treatment failure, relapse, or emergence of resistant strains [2,3].

51 The ATT recommended by World Health Organization (WHO) and implemented since 2009 in  
52 the Brazilian guidelines is as a fixed-dose (FDC), single-tablet combination of four drugs (rifampicin,  
53 isoniazid, pyrazinamide, and ethambutol) during the intensive phase of treatment followed by  
54 rifampicin and isoniazid in FDC until the end of treatment [4]

55 Retrospective studies conducted in Brazil found an incidence of ADR between 23% to 83% [5–  
56 7] and in a meta-analysis including other non-Brazilian studies, the incidence varied from 8.4% to  
57 83.5% [8]. ADRs are multifactorial [9,10] and the major determinants are unadjusted prescribed doses  
58 of medications, patient's age, nutritional status, alcohol consumption, liver and kidney function and  
59 HIV-infection [11,12].

60 In people living with HIV (PLHIV), co-administration of antiretroviral therapy (ART) and ATT  
61 increases the risk of drug interactions, immunopathological responses, and ADRs [13]. ADRs have  
62 been associated with almost two-fold increased risk of unsuccessful treatment outcomes after 6 months  
63 of ATT [14].

64 According to data from the Brazilian Ministry of Health, in the year of 2020, 8.5% of new  
65 diagnoses of tuberculosis were in PLHIV [15]. ART during ATT is challenging because of drug-to-  
66 drug interactions and increased risk of ADR. In Brazil there are few studies on ADR in PLHIV treating  
67 TB, with no definitive conclusion. The aim of this study is to evaluate the impact of ADR due to ATT

68 and factors associated with favorable and unfavorable outcomes. We hypothesize that ADR occurrence  
69 could increase unfavorable outcome occurrences.

## 70 **Methods**

### 71 **Ethics statement**

72 The study was approved by the Institutional Review Board of the National Institute of Infectious  
73 Diseases Evandro Chagas (INI) (CAAE: 86215118.5.0000.5262). Written informed consent was  
74 obtained from all participants involved in the study and all clinical investigations were conducted  
75 according to the principles expressed in the Declaration of Helsinki.

### 76 **Study design**

77 We conducted a prospective cohort study with TB patients treated and followed up at the Clinical  
78 Research Laboratory on Mycobacteria (LAPCLIN-TB) of the National Institute of Infectious diseases  
79 Evandro Chagas (INI), Oswaldo Cruz Foundation (FIOCRUZ), Rio de Janeiro, Brazil, from January  
80 2010 to December 2016. In LAPCLIN-TB a cohort study has been active since 2000, with data  
81 registered at a standardized visit template. The information is captured at each patient's visit. Raw data  
82 is shown in S1 File.

### 83 **Inclusion and exclusion criteria**

84 The inclusion criteria were 18 years old or more and pulmonary, extrapulmonary or  
85 disseminated TB. The exclusion criteria were death or loss to follow up (LTFU) within the first 15  
86 days of ATT (early death or early LTFU avoiding data capture), rifampicin and isoniazid resistance  
87 (MDR) and lack of information on outcomes. Patients initially diagnosed with TB based on clinical-  
88 radiologic evaluation who were later diagnosed with another disease rather than tuberculosis were also  
89 excluded.

## 90 **TB diagnosis and follow up visits**

91 Tuberculosis diagnosis was clinical-radiological (based on symptoms and signs and chest X-ray  
92 findings), in some cases confirmed by laboratory tests (acid fast smears and/or culture and/or  
93 histopathological findings and/or Xpert-MTB/RIF™). In cases without laboratory confirmation, a  
94 positive therapeutic response to ATT was considered for TB diagnosis (clinical-radiological  
95 improvement with ATT). Visits were scheduled at baseline (ATT initiation), 15, 30, 60, 90, 120, 150  
96 and 180 days after ATT initiation. Sometimes treatment was prolonged, especially for disseminated or  
97 extrapulmonary TB cases and due to a physician decision. In these cases, there were monthly visits  
98 scheduled after the 180 days of ATT. Data were entered into an electronic medical record and  
99 standardized information was collected using a predefined template in all visits.

100 During the baseline visit, information collected included demographic variables such as age, sex, race  
101 (self-reported), marital status, schooling (illiterate, elementary school up to 12 years, and high  
102 schooling above 12 years), social behavior (alcohol, tobacco, illicit drugs use/addiction), clinical  
103 information such as clinical forms of tuberculosis (pulmonary, extrapulmonary or disseminated - 2 or  
104 more non-contiguous sites), presence of comorbidities, and concomitant medications use. At baseline  
105 visits laboratory tests were collected: hemogram, urea, creatinine, uric acid, alanine (ALT) and  
106 aspartate (AST) transferases, albumin, alkaline phosphatase, gamma glutamyl transferase (GGT), chest  
107 X-ray, hepatitis B, C and HIV serology. At subsequent visits, ADR were monitored with clinical  
108 information and laboratory evaluation (hemogram and biochemistry including liver enzymes) in all  
109 visits. For known PLHIV, CD4 count, and HIV viral load (VL) were added at baseline visits and at the  
110 end of ATT.

## 111 **Anti-TB treatment (ATT)**

112 Since 2009, Brazilian guidelines incorporated WHO-recommendation of rifampicin 600 mg, isoniazid  
113 300 mg, pyrazinamide 1600 mg and ethambutol 1100 mg in FDC for two months, followed by four  
114 months of rifampicin 600 mg and isoniazid 300 mg in FDC, for both new and retreatment TB cases  
115 until drug-susceptibility tests were available. Doses were adjusted for patients with less than 50kg [4].

#### 116 **HIV treatment**

117 ART was prescribed for PLHIV, by each assistant physician, according to Brazilian guidelines for  
118 Sexual Transmitted Diseases and AIDS [16]. The recommended ATT for PLHIV included a rifamycin  
119 (rifampicin or rifabutin), which was chosen according to the ART regimen appropriate for each specific  
120 patient. Rifabutin 150 mg/day was chosen when protease inhibitors were prescribed as part of ART  
121 [11]. ART was introduced for naïve patients as soon as possible, which happened around the first month  
122 of ATT in most cases.

#### 123 **Smoke habit**

124 A current smoker was defined as someone who was smoking at the time of tuberculosis diagnosis  
125 and/or at the beginning of ATT or who stopped smoking due to tuberculosis symptoms but went back  
126 to smoke during ATT.

#### 127 **Illicit drug users**

128 All patients who reported to be currently using drugs were considered illicit drug users.

#### 129 **Alcohol abusers**

130 All patients answered the CAGE questionnaire [17] and those who answered yes to 2 or more questions  
131 were considered as having significant alcohol addiction.

#### 132 **Adverse Drug Reaction (ADR)**

133 ADR were defined according to signs and symptoms (clinical), laboratory tests abnormalities  
134 (laboratory) or both (clinical and laboratory). ADRs were categorized according to WHO-ART  
135 classification [18]. The scale of intensity was based on the Division of AIDS table for grading the  
136 severity of adult and pediatric ADR [19]: Grade 1: mild event, Grade 2: moderate event, Grade 3:  
137 severe event, Grade 4: potentially life-threatening event, Grade 5: death. The causality of ADRs were  
138 assessed using the Naranjo Scale, as improbable, possible, probable, and definitively related to the  
139 medications [20]. Only probable, possible, and definitively related ADR were considered for the  
140 analysis.

## 141 **Outcomes**

142 Outcomes were based on WHO criteria [21]. The success of treatment consisted of cure and  
143 treatment conclusion which were considered favorable outcomes. Unfavorable outcomes were grouped  
144 (composite outcome) and included treatment failure (remaining smear-positive after the 4th month of  
145 ATT), transfer to different treatment facilities (patients who were transferred out to other health unit),  
146 LTFU (interruption of treatment for two or more consecutive months) and death associated with  
147 tuberculosis (all cases were revised and the causality assessed).

## 148 **Data analyses**

149 Descriptive statistics was performed using the median values with interquartile ranges (IQR) as  
150 measures of central tendency and dispersion for continuous variables. Categorical variables were  
151 described using frequency (no.) and proportions (%). The Mann–Whitney U test (for two unmatched  
152 groups) was used to compare continuous variables and the Pearson chi-square test was used to compare  
153 categorical variables between study groups. The Kaplan-Meier curve was used to estimate ADR-free  
154 probabilities.

155 A logistic binary regression was performed with backward stepwise selection using variables with  
156 univariate p-value  $\leq 0.2$  to identify independent associations between characteristics of tuberculosis  
157 patients with the composite unfavorable treatment outcome. Results from regression were presented in  
158 terms of point estimates and 95% confidence intervals (CI). All analyses were pre-specified.  
159 Differences with p-values below 0.05 after adjustment for multiple comparisons (Holm-Bonferroni)  
160 were considered statistically significant.

161 The statistical analyses and data visualization were performed using rstatix (version 0.4.0), stats  
162 (version 3.6.2), ggplot2 (version 3.3.2), survivor (version 3.2.7) and survminer (version 0.4.8) R  
163 packages.

## 164 **Results**

165 From 2010 to 2016, 606 patients were enrolled in this study. Fifty-six patients with exclusion criteria  
166 were ruled out: 31 with MDR tuberculosis, 18 with other diagnoses during ATT (including non-  
167 tuberculous mycobacteria), two due to early death, and one because of early LTFU. Two patients were  
168 removed from the dataset due to lack of information on the outcomes.

169 A total of 550 patients were included in this study. Only patients with ADR (total 426) were included  
170 in these analyses (**Figure 1A**). **Table 1** shows a comparison of favorable and unfavorable outcomes  
171 regarding their sociodemographic and clinical characteristics. The median age was 38 years, 329  
172 (59.8%) were male and 193 (35.1%) were PLHIV. Among patients with unfavorable outcomes: 84  
173 were LTFU, 7 had a treatment failure and 7 died.

174 **Figure 1. Study Design and probability of presenting adverse reactions during the antitubercular**  
175 **treatment. (A) Study design. (B) Event free curve (Kaplan-Meier) of Tuberculosis patients**  
176 **during antitubercular treatment. Mean time (in state, restricted max time = 365) in days of event**



177 **occurrence: 140.7. Abbreviation: ADR: adverse drug reaction; ATT: anti-TB treatment; CI:**  
 178 **confidence interval; TB: tuberculosis.**

179

180 **Table 1. Clinical, social demographics and comorbidities according to outcomes**

|                           | <b>All (n=550)</b> | <b>Favorable<br/>(n=452)</b> | <b>Unfavorable<br/>(n=98)</b> | <b>p<br/>value</b> |
|---------------------------|--------------------|------------------------------|-------------------------------|--------------------|
| <b>Male, n (%):</b>       | 329 (59.8)         | 256 (56.6)                   | 73 (74.5)                     | <b>0.002</b>       |
| <b>Age, median (IQR):</b> | 38 (29-49)         | 39 (29-50)                   | 36 (28.2-46.8)                | 0.138              |
| <b>Race, n (%):</b>       |                    |                              |                               | <b>&lt;0.001</b>   |
| White                     | 281 (51.1)         | 250 (55.3)                   | 31 (31.6)                     |                    |
| Black/Pardo               | 269 (48.9)         | 202 (44.7)                   | 67 (68.4)                     |                    |
| <b>Scholarity, n (%):</b> |                    |                              |                               | <b>&lt;0.001</b>   |
| Illiterate                | 21 (3.82)          | 16 (3.54)                    | 5 (5.10)                      |                    |
| Elementary<br>School      | 449 (81.6)         | 356 (78.8)                   | 93 (94.9)                     |                    |
| High School               | 80 (14.5)          | 80 (17.7)                    | 0 (0.00)                      |                    |
| <b>Married, n (%):</b>    | 279 (50.7)         | 239 (52.9)                   | 40 (40.8)                     | <b>0.040</b>       |

|                                      |                |                 |                |                  |
|--------------------------------------|----------------|-----------------|----------------|------------------|
| <b>Tobacco use, n (%):</b>           | 191 (34.7)     | 134 (29.6)      | 57 (58.2)      | <b>&lt;0.001</b> |
| <b>Alcohol abuse, n (%):</b>         | 212 (38.5)     | 156 (34.5)      | 56 (57.1)      | <b>&lt;0.001</b> |
| <b>Illicit drug use, n (%):</b>      | 121 (22.0)     | 78 (17.3)       | 43 (43.9)      | <b>&lt;0.001</b> |
| <b>Initial Weight, median (IQR):</b> | 58 (50.6-67.5) | 59.7 (50.7-9.6) | 56.3 (50.1-64) | <b>0.023</b>     |
| <b>ADR occurrence, n (%):</b>        | 431 (78.6)     | 372 (82.5)      | 59 (60.8)      | <b>&lt;0.001</b> |
| <b>Type of TB, n (%):</b>            |                |                 |                | <b>0.023</b>     |
| PTB                                  | 290 (52.7)     | 238 (52.7)      | 52 (53.1)      | 1                |
| EPTB                                 | 170 (30.9)     | 148 (32.7)      | 22 (22.4)      | 0.060            |
| Disseminated                         | 90 (16.4)      | 66 (14.6)       | 24 (24.5)      | <b>0.025</b>     |
| <b>Changed treatment, n (%):</b>     | 64 (11.6)      | 49 (10.8)       | 15 (15.3)      | 0.282            |
| <b>Hepatitis B or C, n (%):</b>      | 28 (5.09)      | 23 (5.09)       | 5 (5.10)       | 1                |

|                                  |            |            |           |                  |
|----------------------------------|------------|------------|-----------|------------------|
| <b>Diabetes mellitus, n (%):</b> | 50 (9.09)  | 46 (10.2)  | 4 (4.08)  | 0.087            |
| <b>Hypertension, n (%):</b>      | 78 (14.2)  | 72 (15.9)  | 6 (6.12)  | <b>0.018</b>     |
| <b>COPD, n (%):</b>              | 10 (1.82)  | 9 (1.99)   | 1 (1.02)  | 1                |
| <b>HIV infection, n (%):</b>     | 193 (35.1) | 141 (31.2) | 52 (53.1) | <b>&lt;0.001</b> |
| ART naive, n (%)                 | 74 (38.7)  | 62 (44.3)  | 12 (23.5) | <b>0.015</b>     |

181 **Table Note:**

182 Data are shown as median and interquartile (IQR) range or number and frequency (percentage). Data  
 183 were compared between the clinical groups using the Mann–Whitney U test (continuous variables) or  
 184 the Pearson’s  $\chi^2$  tests (for data on frequency). Bold in p-value indicates  $p < 0.05$ .

185 Weight was measured in kilograms. Abbreviations: ADR: adverse drug reaction; HIV: Human  
 186 immunodeficiency virus; IQR: Interquartile Range; TB: tuberculosis;

187

188 All participants who died were PLHIV with clinical and/or laboratorial signs of advanced  
 189 immunodeficiency. No deaths were related to ADR. We observed significant differences in race,  
 190 schooling, smoking habits, and alcohol consumption among cases with unfavorable outcomes when  
 191 compared to patients who experienced favorable outcomes. ADR occurred in 78.6% of participants,  
 192 35.1% of ADR were in PLHIV. Despite the high incidence, occurrence of ADR was higher in the group  
 193 of participants who experienced favorable ATT outcomes.

194 Our analysis of the type, severity, date of onset, relationship with the ATT and WHO-ART  
 195 classification according to outcomes are presented in **Table 2**. According to WHO-ART classification,

196 gastro-intestinal system disorders (23.9%) followed by “metabolic and nutritional disorders” (22.4%),  
 197 were the most prevalent ADR related to unfavorable outcomes. The probability of ADR was higher  
 198 until 140 days of ATT (**Figure 1B**). In the logistic regression model, smoking habit, illicit drugs use,  
 199 and HIV-infection were associated with unfavorable outcomes (**Figure 2**).

200 **Table 2. ADR characteristics according to ATT outcome**

|                                                        | All (n=695)            | Favorable<br>(n=628)   | Unfavorable<br>(n=67)   | p value          |
|--------------------------------------------------------|------------------------|------------------------|-------------------------|------------------|
| <b>Type of event, n (%)</b>                            |                        |                        |                         | <b>0.95</b>      |
| <b>Clinical + Laboratory</b>                           | <b>87 (12.5)</b>       | <b>78 (12.4)</b>       | <b>9 (13.4)</b>         |                  |
| <b>Laboratory</b>                                      | <b>228 (32.8)</b>      | <b>207 (33.0)</b>      | <b>21 (31.3)</b>        |                  |
| <b>Clinical</b>                                        | <b>380 (54.7)</b>      | <b>343 (54.6)</b>      | <b>37 (55.2)</b>        |                  |
| <b>Adverse reactions duration (days), median (IQR)</b> | <b>77.0 (39.0-142)</b> | <b>81.5 (43.0-147)</b> | <b>44.0 (25.0-85.0)</b> | <b>&lt;0.001</b> |
| <b>Severity of ADR, n (%)</b>                          |                        |                        |                         | <b>0.128</b>     |
| <b>Grade 1</b>                                         | <b>264 (38.0)</b>      | <b>246 (39.2)</b>      | <b>18 (26.9)</b>        |                  |

|                                         |                   |                   |                  |              |
|-----------------------------------------|-------------------|-------------------|------------------|--------------|
| <b>Grade 2</b>                          | <b>352 (50.6)</b> | <b>314 (50.0)</b> | <b>38 (56.7)</b> |              |
| <b>Grade 3</b>                          | <b>67 (9.64)</b>  | <b>57 (9.08)</b>  | <b>10 (14.9)</b> |              |
| <b>Grade 4</b>                          | <b>12 (1.73)</b>  | <b>11 (1.75)</b>  | <b>1 (1.49)</b>  |              |
| <b>Onset of ADR, n (%):</b>             |                   |                   |                  | <b>0.38</b>  |
| <b>before 2nd month (early)</b>         | <b>592 (85.2)</b> | <b>532 (84.7)</b> | <b>60 (89.6)</b> |              |
| <b>after month 2 (late)</b>             | <b>103 (14.8)</b> | <b>96 (15.3)</b>  | <b>7 (10.4)</b>  |              |
| <b>Relation of ADR with ATT, n (%):</b> |                   |                   |                  | <b>0.601</b> |
| <b>Related</b>                          | <b>14 (2.01)</b>  | <b>14 (2.23)</b>  | <b>0 (0.00)</b>  |              |
| <b>Probable</b>                         | <b>171 (24.6)</b> | <b>153 (24.4)</b> | <b>18 (26.9)</b> |              |
| <b>Possible</b>                         | <b>510 (73.4)</b> | <b>461 (73.4)</b> | <b>49 (73.1)</b> |              |
| <b>WHO ART classification, n (%):</b>   |                   |                   |                  | <b>0.207</b> |

|                                                        |                   |                   |                  |  |
|--------------------------------------------------------|-------------------|-------------------|------------------|--|
| <b>Central and peripheral nervous system disorders</b> | <b>45 (6.47)</b>  | <b>43 (6.85)</b>  | <b>2 (2.99)</b>  |  |
| <b>Gastro-intestinal system disorder</b>               | <b>151 (21.7)</b> | <b>135 (21.5)</b> | <b>16 (23.9)</b> |  |
| <b>Liver and biliary system disorders</b>              | <b>54 (7.77)</b>  | <b>44 (7.01)</b>  | <b>10 (14.9)</b> |  |
| <b>Metabolic and nutritional disorders</b>             | <b>171 (24.6)</b> | <b>156 (24.8)</b> | <b>15 (22.4)</b> |  |
| <b>Musculo-skeletal disorders</b>                      | <b>63 (9.06)</b>  | <b>56 (8.92)</b>  | <b>7 (10.4)</b>  |  |
| <b>Other</b>                                           | <b>46 (6.62)</b>  | <b>45 (7.17)</b>  | <b>1 (1.49)</b>  |  |
| <b>Skin and appendages disorders</b>                   | <b>125 (18.0)</b> | <b>113 (18.0)</b> | <b>12 (17.9)</b> |  |

201 **Table Note:**

202 Data are shown as median and interquartile (IQR) range or number and frequency (percentage). Data  
 203 were compared between the clinical groups using the Mann–Whitney U test (continuous variables) or  
 204 the Pearson’s  $\chi^2$  tests (for data on frequency). Bold in p-value indicates  $p < 0.05$ .

205

206 **Figure 2. Association between clinical characteristics and tuberculosis treatment outcomes**  
207 **among tuberculosis patients. The logistic binary regression model (backward stepwise**  
208 **regression) was performed to evaluate the independent associations between clinical**  
209 **characteristics, including adverse drug reaction occurrence, of tuberculosis patients and**  
210 **variables with p-value <0.2 results in the univariate analyses (Table 1) and unfavorable**  
211 **treatment outcome. Abbreviation: ADR: adverse drug reaction; CI: confidence interval; TB:**  
212 **tuberculosis.**

213 We compared the clinical characteristics and ADR presentation of patients according to HIV status and  
214 noted that there were significant differences between the groups (**Table 3**). Self-reported race, marital  
215 status, smoking habits, alcohol abuse, illicit drug use in the PLHIV group were associated with  
216 unfavorable outcomes. ADR occurred in 78.6% of total participants and 72,8% of them were in the  
217 PLHIV. Although diagnosis of viral hepatitis serology was included in our model, it was not associated  
218 with unfavorable outcomes, but the number of positive cases was small and we did not test viral load  
219 to confirm active hepatitis. The main finding of this investigation was that PLHIV experienced more  
220 severe forms of ADR than HIV-unexposed participants, especially liver and biliary system disorders  
221 (**Table 4**).

222 **Table 3. Sociodemographics and clinical characteristics of patients according to HIV status**

|              | All (n=425) | HIV<br>(n=141) | non-HIV<br>(n=284) | p value      |
|--------------|-------------|----------------|--------------------|--------------|
| Male, n (%): | 258 (60.6)  | 97 (68.8)      | 161 (56.5)         | <b>0.019</b> |

|                               |                  |                  |                  |                  |
|-------------------------------|------------------|------------------|------------------|------------------|
| Age, median (IQR):            | 39.0 (29.0-50.0) | 37.0 (31.0-47.0) | 40.0 (28.0-53.0) | 0.244            |
| White (race), n (%):          | 230 (54.0)       | 52 (36.9)        | 178 (62.5)       | <b>&lt;0.001</b> |
| Married, n (%):               | 229 (53.8)       | 57 (40.4)        | 172 (60.4)       | <b>&lt;0.001</b> |
| Tobacco use, n (%):           | 144 (33.8)       | 64 (45.4)        | 80 (28.1)        | <b>0.001</b>     |
| Alcohol abuse, n (%):         | 160 (37.6)       | 70 (49.6)        | 90 (31.6)        | <b>&lt;0.001</b> |
| Illicit drug use, n (%):      | 88 (20.7)        | 44 (31.2)        | 44 (15.4)        | <b>&lt;0.001</b> |
| Type of TB, n (%):            |                  |                  |                  | <b>&lt;0.001</b> |
| PTB                           | 222 (52.1)       | 65 (46.1)        | 157 (55.1)       |                  |
| EPTB                          | 135 (31.7)       | 19 (13.5)        | 116 (40.7)       |                  |
| Disseminated                  | 69 (16.2)        | 57 (40.4)        | 12 (4.21)        |                  |
| Initial Weight, median (IQR): | 59.0 (51.0-68.0) | 59.6 (50.7-68.0) | 57.1 (53.8-64.0) | 0.836            |



|                           |           |           |           |              |
|---------------------------|-----------|-----------|-----------|--------------|
| Hepatitis B or C, n (%):  | 21 (4.93) | 11 (7.80) | 10 (3.51) | 0.091        |
| Diabetes mellitus, n (%): | 41 (9.62) | 11 (7.80) | 30 (10.5) | 0.47         |
| Hypertension, n (%):      | 70 (16.4) | 12 (8.51) | 58 (20.4) | <b>0.003</b> |
| COPD, n (%):              | 8 (1.88)  | 1 (0.71)  | 7 (2.46)  | 0.28         |

223 **Table Note:**

224 Data are shown as median and interquartile (IQR) range or number and frequency (percentage). Data  
 225 were compared between the clinical groups using the Mann–Whitney *U* test (continuous variables) or  
 226 the Pearson’s  $\chi^2$  tests (for data on frequency). Bold in p-value indicates  $p < 0.05$ .

227 Weight was measured in kilograms. Abbreviations: COPD: Chronic obstructive pulmonary disease;  
 228 ART: Antiretroviral Therapy; HIV: Human immunodeficiency virus; IQR: Interquartile Range; TB:  
 229 tuberculosis.

230

231 **Table 4. ADR characteristics according to intensity of ADR in PLHIV**

|                       | All (n=273) | ADR 1/2 (n=223) | ADR 3/4 (n=50) | p value          |
|-----------------------|-------------|-----------------|----------------|------------------|
| Type of event, n (%): |             |                 |                | <b>&lt;0.001</b> |
| Laboratory            | 96 (35.2)   | 73 (32.7)       | 23 (46.0)      |                  |
| Clinical              | 122 (44.7)  | 115 (51.6)      | 7 (14.0)       |                  |
| Clinical +            |             |                 |                |                  |
| Laboratory            | 55 (20.1)   | 35 (15.7)       | 20 (40.0)      |                  |

|                                   |                       |                      |                       |                  |
|-----------------------------------|-----------------------|----------------------|-----------------------|------------------|
| Onset of ADR,<br>median (IQR):    | 21.0 (12.00-<br>55.0) | 21.0 (11.0-<br>60.0) | 20.0 (14.00-<br>35.0) | <b>&lt;0.001</b> |
| Adverse reactions                 |                       |                      |                       |                  |
| duration (days),<br>median (IQR): | 77.0 (35.0-<br>136)   | 75.0 (36.0-<br>126)  | 83.0 (31.0-<br>153)   | 0.731            |
| Severity of ADR, n                |                       |                      |                       |                  |
| (%):                              |                       |                      |                       | 0.308            |
| Grade 1                           | 90 (33.0)             | 90 (40.4)            | 0 (0.00)              |                  |
| Grade 2                           | 133 (48.7)            | 133 (59.6)           | 0 (0.00)              |                  |
| Grade 3                           | 43 (15.8)             | 0 (0.00)             | 43 (86.0)             |                  |
| Grade 4                           | 7 (2.56)              | 0 (0.00)             | 7 (14.0)              |                  |
| Relation ADR with                 |                       |                      |                       |                  |
| ATT, n (%):                       |                       |                      |                       | <b>0.043</b>     |
| Probable                          | 64 (23.4)             | 46 (20.6)            | 18 (36.0)             |                  |
| Possible                          | 201 (73.6)            | 171 (76.7)           | 30 (60.0)             |                  |
| Related                           | 8 (2.93)              | 6 (2.69)             | 2 (4.00)              |                  |
| Onset of ADR, n (%):              |                       |                      |                       |                  |
| before 2nd month<br>(early)       | 215 (78.8)            | 169 (75.8)           | 46 (92.0)             | <b>0.019</b>     |
| after month 2 (late)              | 58 (21.2)             | 54 (24.2)            | 4 (8.00)              |                  |

WHO ART

classification, n (%):

Central and

peripheral nervous

|                  |           |           |          |
|------------------|-----------|-----------|----------|
| system disorders | 13 (4.76) | 12 (5.38) | 1 (2.00) |
|------------------|-----------|-----------|----------|

Gastro-intestinal

|                 |           |           |          |
|-----------------|-----------|-----------|----------|
| system disorder | 42 (15.4) | 42 (18.8) | 0 (0.00) |
|-----------------|-----------|-----------|----------|

Liver and biliary

|                  |           |           |           |
|------------------|-----------|-----------|-----------|
| system disorders | 41 (15.0) | 22 (9.87) | 19 (38.0) |
|------------------|-----------|-----------|-----------|

Metabolic and

|                       |           |           |          |
|-----------------------|-----------|-----------|----------|
| nutritional disorders | 52 (19.0) | 47 (21.1) | 5 (10.0) |
|-----------------------|-----------|-----------|----------|

Musculo-skeletal

|           |           |           |          |
|-----------|-----------|-----------|----------|
| disorders | 35 (12.8) | 26 (11.7) | 9 (18.0) |
|-----------|-----------|-----------|----------|

Other

|  |           |           |          |
|--|-----------|-----------|----------|
|  | 15 (5.49) | 13 (5.83) | 2 (4.00) |
|--|-----------|-----------|----------|

Skin and

|                      |           |           |          |
|----------------------|-----------|-----------|----------|
| appendages disorders | 45 (16.5) | 42 (18.8) | 3 (6.00) |
|----------------------|-----------|-----------|----------|

White cell and RES

|                        |           |           |           |
|------------------------|-----------|-----------|-----------|
| and platelet disorders | 30 (11.0) | 19 (8.52) | 11 (22.0) |
|------------------------|-----------|-----------|-----------|

WHO ART

dichotomized, n (%):

**<0.001**

Liver and biliary

|                  |           |           |           |
|------------------|-----------|-----------|-----------|
| system disorders | 41 (15.0) | 22 (9.87) | 19 (38.0) |
|------------------|-----------|-----------|-----------|

Others 232 (85.0) 201 (90.1) 31 (62.0)

232 **Table Note:**

233 Data are shown as median and interquartile (IQR) range or number and frequency (percentage). Data  
 234 were compared between the clinical groups using the Mann–Whitney U test (continuous variables) or  
 235 the Pearson’s  $\chi^2$  tests (for data on frequency). Bold in p-value indicates  $p < 0.05$ . Abbreviations: ADR:  
 236 adverse drug reaction; HIV: Human immunodeficiency virus; IQR: Interquartile Range; TB:  
 237 tuberculosis;

238

239 According to clinical data, it was observed that among PLHIV, median CD4 count was 166 cell/ $\mu$ l and  
 240 those with ADR grade 3 and 4 had lower CD4 count compared to those with ADR grade 1 and 2 and  
 241 most of those with ADR grade 3/4 displayed CD4 count below 100/uL (**Table 5**). The characteristics  
 242 of ADR differed between cases of grade 1/2 compared to those graded 3/4 in terms of type, time of  
 243 onset, relationship with treatment, and affected system. The most affected system in patients with grade  
 244 3/4 ADR was the liver and biliary system (**Table 5**). Considering all PLHIV, 53.1% experienced  
 245 unfavorable outcomes ( $p < 0.001$ ). Among them, 183 (33.3%) were ART-experienced while 38.7%  
 246 ART naïve. In the group of ART experienced patients, 48 (49%) experienced unfavorable outcomes  
 247 ( $p < 0.001$ ).

248 **Table 5. Clinical and laboratory characteristics according to intensity of ADR in PLHIV**

|                    | All (n=140) | 1/2 (n=114) | 3/4 (n=26) | p value          |
|--------------------|-------------|-------------|------------|------------------|
| Type of TB, n (%): |             |             |            | <b>&lt;0.001</b> |
| PTB                | 65 (46.1)   | 55 (48.2)   | 10 (38.5)  |                  |
| EPTB               | 19 (13.5)   | 16 (14.0)   | 3 (11.5)   |                  |

|                               |                  |                  |                  |              |
|-------------------------------|------------------|------------------|------------------|--------------|
| Disseminated                  | 57 (40.4)        | 43 (37.7)        | 13 (50.0)        |              |
| HIV Viral Load, median (IQR): | 4.53 (3.26-5.33) | 4.44 (3.21-5.40) | 4.86 (3.55-5.21) | 0.871        |
| CD4 (cells/uL), median (IQR): | 166 (43.0-353)   | 176 (52.8-360)   | 110 (26.8-180)   | 0.065        |
| CD4 levels, n (%):            |                  |                  |                  | <b>0.033</b> |
| <100                          | 56 (40.0)        | 43 (37.8)        | 13 (50.0)        |              |
| 100-200                       | 30 (21.4)        | 21 (18.4)        | 9 (34.6)         |              |
| >200                          | 54 (38.6)        | 50 (43.9)        | 4 (15.4)         |              |
| Initial Weight, median (IQR): | 59.0 (51.0-68.0) | 59.6 (50.7-68.0) | 57.1 (53.8-64.0) | 0.836        |
| Hepatitis B or C, n (%):      | 11 (7.86)        | 11 (9.65)        | 0 (0.0)          | 0.091        |
| Diabetes mellitus, n (%):     | 10 (7.14)        | 7 (6.1)          | 3 (11.5)         | 0.47         |
| Hypertension, n (%):          | 10 (7.14)        | 8 (7.01)         | 2 (7.7)          | 1.000        |

|              |          |          |         |       |
|--------------|----------|----------|---------|-------|
| COPD, n (%): | 1 (0.71) | 1 (0.88) | 0 (0.0) | 1.000 |
|--------------|----------|----------|---------|-------|

249 **Table Note:**

250 Data are shown as median and interquartile (IQR) range or number and frequency (percentage). Data  
251 were compared between the clinical groups using the Mann–Whitney U test (continuous variables) or  
252 the Pearson’s  $\chi^2$  tests (for data on frequency). Bold in p-value indicates  $p < 0.05$ .

253 Weight was measured in kilograms. Abbreviations: COPD: Chronic obstructive pulmonary disease;  
254 ART: Antiretroviral Therapy; HIV: Human immunodeficiency virus; IQR: Interquartile Range; TB:  
255 tuberculosis.

256

## 257 **Discussion**

258 The impact of unsuccessful ATT can directly impair the strategies for TB control [22,23]. The main  
259 findings of our study were: ADR was not associated with unfavorable outcomes and PLHIV had higher  
260 ADR intensity than HIV-unexposed study participants, which were mainly liver and biliary system  
261 disorders, especially those with lower CD4 counts.

262 As expected, most patients who were lost to follow up had licit or illicit drug addiction. These findings  
263 are of great importance for planning strategies to decrease harm but increase early ART, even with the  
264 risk of drug to drug interaction. As there was a considerable LTFU, representing the predominant  
265 unfavorable outcome, it is urgent to create policies to increase treatment adherence.

266 In our data male sex was found to be significantly associated with unfavorable outcomes. A possible  
267 explanation is that men were less likely to regularly follow treatment when compared with women in  
268 our setting [15]. In our study, low schooling, smoke habit and illicit drug use were associated with  
269 unfavorable outcomes. However, among PLHIV, alcohol abuse was the only independent factor  
270 associated with unfavorable outcomes. Other studies in the literature have shown the same correlation  
271 between alcohol abuse [2,24,25] and in the general population, smoke habit was associated with  
272 unfavorable outcomes as well as in our study [26].

273 ADRs were not associated with unfavorable outcomes, contrary to our primary expectations. Probably,  
274 patients who experienced ADR were better managed and/or more closely monitored, which contributed  
275 to feeling well cared for and having a good adherence to therapy. In contrast, a previous prospective  
276 study in Rwanda with TB patients, with or without HIV-infection, has shown that ADRs were  
277 associated with an almost two-fold increased risk of LTFU [2].

278 Another correlation observed in our study was that high schooling participants did not present any  
279 unfavorable outcome, which was not a surprise since they probably have a better understanding about

280 the importance of treatment adherence for TB cure. Definitive treatment interruption before cure can  
281 lead to recurrence, development of drug resistance, increased costs and a worse epidemiologic situation  
282 [27].

283 We also explored the liver and biliary system disorders in advanced HIV patients and a high incidence  
284 of hepatotoxicity was associated with low CD4 count, mainly in those with less than 100 cells/uL.  
285 This important finding should help the management of TB in patients with HIV, since more attention  
286 will be directed to this type of ADR in this population. Most ART naïve patients are diagnosed with  
287 HIV due to TB, as HIV serology is done in all patients with TB diagnosis [11]. These are, in general,  
288 the most severe cases and hospitalization is sometimes necessary not only for TB diagnosis but also to  
289 manage severe and serious ADR after ATT introduction. The early ART start in these cases is of special  
290 interest due to the added risk of hepatotoxicity. Sometimes, when ADR occurs, it is necessary to stop  
291 all drugs and reintroduce one by one to identify the causality. Many studies also have found that PLHIV  
292 using concomitant ART and ATT had a higher frequency of ADR and low adherence to treatment [27–  
293 29].

294 In our study we found 26% of PLHIV developing unfavorable outcomes. ART-naïve patients presented  
295 a higher incidence of ADR in comparison with ART-experienced PLHIV, although the latter group  
296 more frequently developed unfavorable outcomes, especially LTFU. Most of these patients were  
297 already cared for at the study referral center or other health clinics and had TB due to low adherence  
298 to ART. These patients are different from ART-naïve patients that had a recent TB diagnosis and were  
299 tested for HIV for the first time.

300 In our routine care, ART commencement occurs as soon as possible in the first month of TB treatment  
301 for those with low CD4 counts, as well as cotrimoxazole prophylaxis, since this approach has already  
302 been proved to reduce mortality [30]. Although all those challenges reported here, our TB lethality was



303 relatively low in PLHIV which shows that the strategy of early ART start works and ADR can be  
304 successfully managed.

305 In conclusion male sex, low schooling, smoke habit, and illicit drug use were all independently  
306 associated with unfavorable outcomes during ATT. In PLHIV, alcohol abuse and previous ART use  
307 were factors associated with unfavorable outcomes. ADR was more frequent in the beginning of TB  
308 treatment and was not associated with unfavorable outcomes.

309 In our study, clinical center patients were attended by different physicians who in general conduct the  
310 whole treatment and have laboratory exams available to help ADRs detection and management. Also,  
311 medical care was available at the hospital every day, 24 hours a day, which helps ADR management  
312 any time they occur. We had some limitations: directly observed treatment (DOT) was not performed  
313 in our site due to our characteristics of being a tertiary hospital and far from most patients' houses.  
314 Viral hepatitis were screened with serology and no viral load was performed, the low proportion of  
315 viral hepatitis in our study limited the analyses in this group.

316 The identification of factors associated with unfavorable outcomes could allow health care to  
317 appropriately risk-stratify patients for closer management and improve outcomes. In addition,  
318 investments in programs destined to reduce tobacco, alcohol and drug addiction are also necessary to  
319 improve TB treatment adherence and decrease LTFU. On the other hand, an investment in education  
320 is necessary by the government to make patients better understand the disease and the importance of  
321 treatment completion.

### 322 **Conflict of interest**

323 The authors declare that the research was conducted in the absence of any commercial or financial  
324 relationships that could be construed as a potential conflict of interest.

### 325 **Author Contributions**

326 FS, CS and VR contributed to conception and design of the study. FS collected the data and organized  
327 the initial database. MA-P and MA performed the statistical analysis and data visualization. VR and  
328 BA supervised the project execution. All authors contributed to manuscript writing, revision, read, and  
329 approved the submitted version.

### 330 **Funding**

331 This work was supported by Brazilian Program of STD-AIDS and Viral Hepatitis, in partnership with  
332 the UNODC and the Clinical Research Laboratory on Mycobacteria of INI, FIOCRUZ, edital  
333 modalidade pesquisas nº 01/2013. The study was partially supported by the Intramural Research  
334 Program of the Fundação Oswaldo Cruz. B.B.A and V.C.R. are senior scientists from the Conselho  
335 Nacional de Desenvolvimento Científico e Tecnológico (CNPq). M.B.A. received a scholarship from  
336 Fundação de Amparo à Pesquisa do Estado da Bahia (FAPESB). M.A.P. received a research fellowship  
337 from the Coordenação de Aperfeiçoamento de Pessoal de Nível Superior (CAPES, finance code: 001).  
338 The funders had no role in study design, data collection and analysis, decision to publish, or preparation  
339 of the manuscript.

### 340 **Acknowledgments**

341 The authors thank the study participants.

342

### 343 **Supplementary material**

344 **S1 File.** Raw data.

345

346

## 347 REFERENCES

- 348 1. World Health Organization. Global tuberculosis report 2021. Geneva; 2021. Available:  
349 <https://www.who.int/publications-detail-redirect/9789240037021>
- 350 2. Castro ATE, Mendes M, Freitas S, Roxo PC. Incidence and risk factors of major toxicity  
351 associated to first-line antituberculosis drugs for latent and active tuberculosis during a period of  
352 10 years. *Rev Port Pneumol* (2006). 2015;21: 144–150. doi:10.1016/j.rppnen.2014.08.004
- 353 3. Lorent N, Sebatunzi O, Mukeshimana G, Ende JV den, Clerinx J. Incidence and Risk Factors of  
354 Serious Adverse Events during Antituberculous Treatment in Rwanda: A Prospective Cohort  
355 Study. *PLOS ONE*. 2011;6: e19566. doi:10.1371/journal.pone.0019566
- 356 4. Brasil. Nota técnica sobre as mudanças no tratamento da tuberculose no Brasil para adultos e  
357 adolescentes. Ministério da Saúde; 2010.
- 358 5. Arriaga MB, Torres NMC, Araujo NCN, Caldas SCC, Andrade BB, Netto EM. Impact of the  
359 change in the antitubercular regimen from three to four drugs on cure and frequency of adverse  
360 reactions in tuberculosis patients from Brazil: A retrospective cohort study. *PLoS One*. 2019;14:  
361 e0227101. doi:10.1371/journal.pone.0227101
- 362 6. Ferreira ACG, Silva Júnior JLR da, Conde MB, Rabahi MF. Desfechos clínicos do tratamento  
363 de tuberculose utilizando o esquema básico recomendado pelo Ministério da Saúde do Brasil  
364 com comprimidos em dose fixa combinada na região metropolitana de Goiânia. *J bras pneumol*.  
365 2013;39: 76–83. doi:10.1590/S1806-37132013000100011
- 366 7. Maciel ELN, Guidoni LM, Favero JL, Hadad DJ, Molino LP, Jonhson JL, et al. [Adverse  
367 effects of the new tuberculosis treatment regimen recommended by the Brazilian Ministry of  
368 Health]. *J Bras Pneumol*. 2010;36: 232–238. doi:10.1590/s1806-37132010000200012
- 369 8. Singh A, Prasad R, Balasubramanian V, Gupta N, Gupta P. Prevalence of adverse drug reaction  
370 with first-line drugs among patients treated for pulmonary tuberculosis. *Clinical Epidemiology  
371 and Global Health*. 2015;3: S80–S90. doi:10.1016/j.cegh.2015.10.005
- 372 9. Prasad R, Singh A, Gupta N. Adverse drug reactions in tuberculosis and management. *Indian J  
373 Tuberc*. 2019;66: 520–532. doi:10.1016/j.ijtb.2019.11.005
- 374 10. Forget EJ, Menzies D. Adverse reactions to first-line antituberculosis drugs. *Expert Opin Drug  
375 Saf*. 2006;5: 231–249. doi:10.1517/14740338.5.2.231
- 376 11. BRASIL. Manual de Recomendações para o Controle da Tuberculose no Brasil. 2019; 366.
- 377 12. Treatment of Tuberculosis. *N Engl J Med*. 2015;373: 2149–2160.  
378 doi:doi:10.1056/NEJMra1413919
- 379 13. Masuka JT, Chipangura P, Nyambayo PP, Stergachis A, Khoza S. A Comparison of Adverse  
380 Drug Reaction Profiles in Patients on Antiretroviral and Antitubercular Treatment in Zimbabwe.  
381 *Clin Drug Investig*. 2018;38: 9–17. doi:10.1007/s40261-017-0579-z

- 382 14. Incidence and risk factors of serious adverse events during antituberculous treatment in  
383 Rwanda: a prospective cohort study - PubMed. [cited 15 Mar 2022]. Available:  
384 <https://pubmed.ncbi.nlm.nih.gov/21611117/>
- 385 15. Boletim Tuberculose 2021 | Departamento de Doenças de Condições Crônicas e Infecções  
386 Sexualmente Transmissíveis. [cited 15 Mar 2022]. Available: [http://www.aids.gov.br/pt-](http://www.aids.gov.br/pt-br/pub/2021/boletim-tuberculose-2021)  
387 [br/pub/2021/boletim-tuberculose-2021](http://www.aids.gov.br/pt-br/pub/2021/boletim-tuberculose-2021)
- 388 16. BRASIL. Guia de Tratamento: Recomendações para Terapia Anti-retroviral em Adultos e  
389 Adolescentes Infectados pelo HIV:2008. Ministério da Saúde; 2008.
- 390 17. Williams N. The CAGE questionnaire. *Occup Med (Lond)*. 2014;64: 473–474.  
391 doi:10.1093/occmed/kqu058
- 392 18. Centre UM. Uppsala Monitoring Centre. [cited 15 Mar 2022]. Available: <https://who-umc.org/>
- 393 19. Division of AIDS (DAIDS) Table for Grading the Severity of Adult and Pediatric Adverse  
394 Events. : 35.
- 395 20. Naranjo CA, Busto U, Sellers EM, Sandor P, Ruiz I, Roberts EA, et al. A method for estimating  
396 the probability of adverse drug reactions. *Clin Pharmacol Ther*. 1981;30: 239–245.  
397 doi:10.1038/clpt.1981.154
- 398 21. World Health Organization. Consolidated guidelines on HIV prevention, testing, treatment,  
399 service delivery and monitoring: recommendations for a public health approach. 2021.  
400 Available: <https://www.who.int/publications-detail-redirect/9789240031593>
- 401 22. Adverse drug reactions associated with first-line anti-tuberculosis drug regimens - PubMed.  
402 [cited 15 Mar 2022]. Available: <https://pubmed.ncbi.nlm.nih.gov/17705952/>
- 403 23. Xia YY, Hu DY, Liu FY, Wang XM, Yuan YL, Tu DH, et al. Design of the Anti-tuberculosis  
404 Drugs induced Adverse Reactions in China National Tuberculosis Prevention and Control  
405 Scheme Study (ADACS). *BMC Public Health*. 2010;10: 267. doi:10.1186/1471-2458-10-267
- 406 24. Przybylski G, Dąbrowska A, Trzcińska H. Alcoholism and other socio-demographic risk factors  
407 for adverse TB-drug reactions and unsuccessful tuberculosis treatment - data from ten years'  
408 observation at the Regional Centre of Pulmonology, Bydgoszcz, Poland. *Med Sci Monit*.  
409 2014;20: 444–453. doi:10.12659/MSM.890012
- 410 25. Zhang T, Du J, Yin X, Xue F, Liu Y, Li R, et al. Adverse Events in Treating Smear-Positive  
411 Tuberculosis Patients in China. *Int J Environ Res Public Health*. 2015;13: E86.  
412 doi:10.3390/ijerph13010086
- 413 26. Liew SM, Khoo EM, Ho BK, Lee YK, Mimi O, Fazlina MY, et al. Tuberculosis in Malaysia:  
414 predictors of treatment outcomes in a national registry. *Int J Tuberc Lung Dis*. 2015;19: 764–  
415 771. doi:10.5588/ijtld.14.0767
- 416 27. Lv X, Tang S, Xia Y, Wang X, Yuan Y, Hu D, et al. Adverse reactions due to directly observed  
417 treatment strategy therapy in Chinese tuberculosis patients: a prospective study. *PLoS One*.  
418 2013;8: e65037. doi:10.1371/journal.pone.0065037

- 419 28. Marks DJB, Dheda K, Dawson R, Ainslie G, Miller RF. Adverse events to antituberculosis  
420 therapy: influence of HIV and antiretroviral drugs. *Int J STD AIDS*. 2009;20: 339–345.  
421 doi:10.1258/ijsa.2008.008361
- 422 29. Breen RAM, Swaden L, Ballinger J, Lipman MCI. Tuberculosis and HIV co-infection: a  
423 practical therapeutic approach. *Drugs*. 2006;66: 2299–2308. doi:10.2165/00003495-200666180-  
424 00003
- 425 30. Havlir DV, Kendall MA, Ive P, Kumwenda J, Swindells S, Qasba SS, et al. Timing of  
426 Antiretroviral Therapy for HIV-1 Infection and Tuberculosis. *N Engl J Med*. 2011;365: 1482–  
427 1491. doi:10.1056/NEJMoa1013607

428

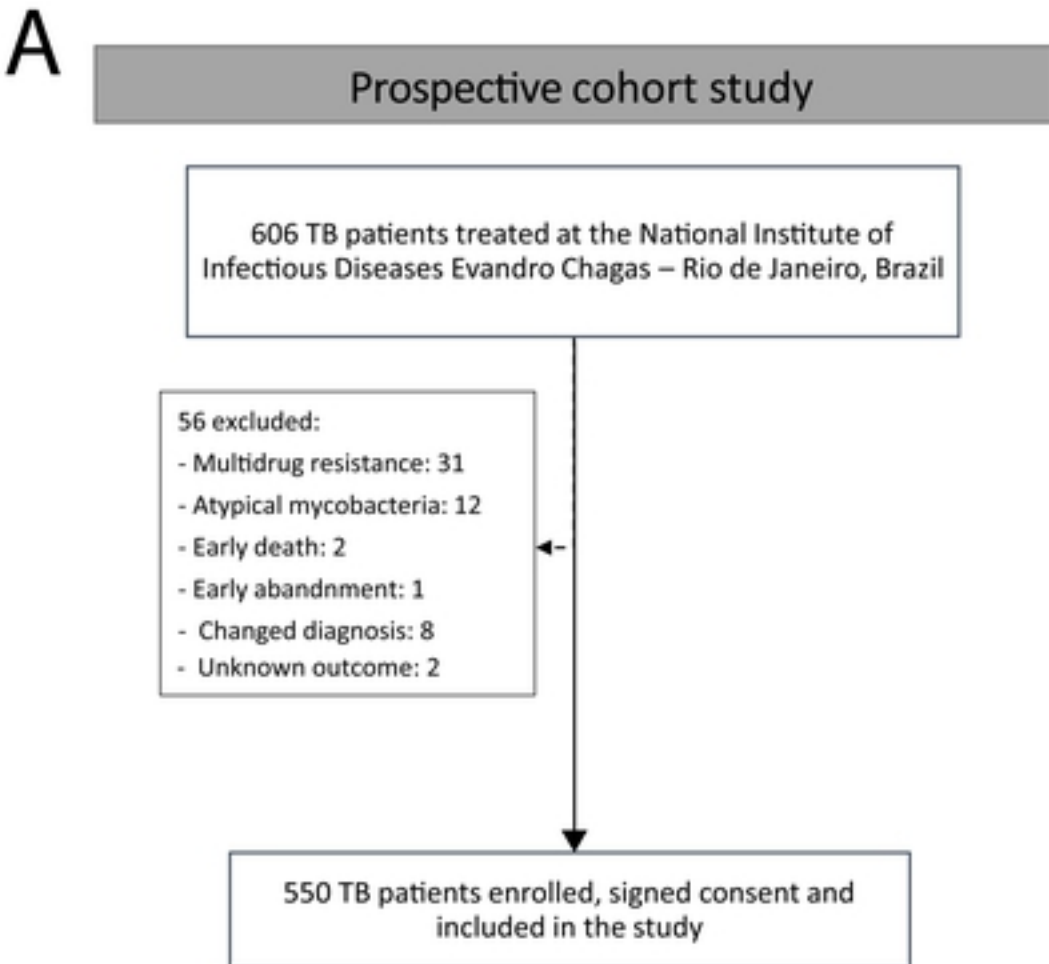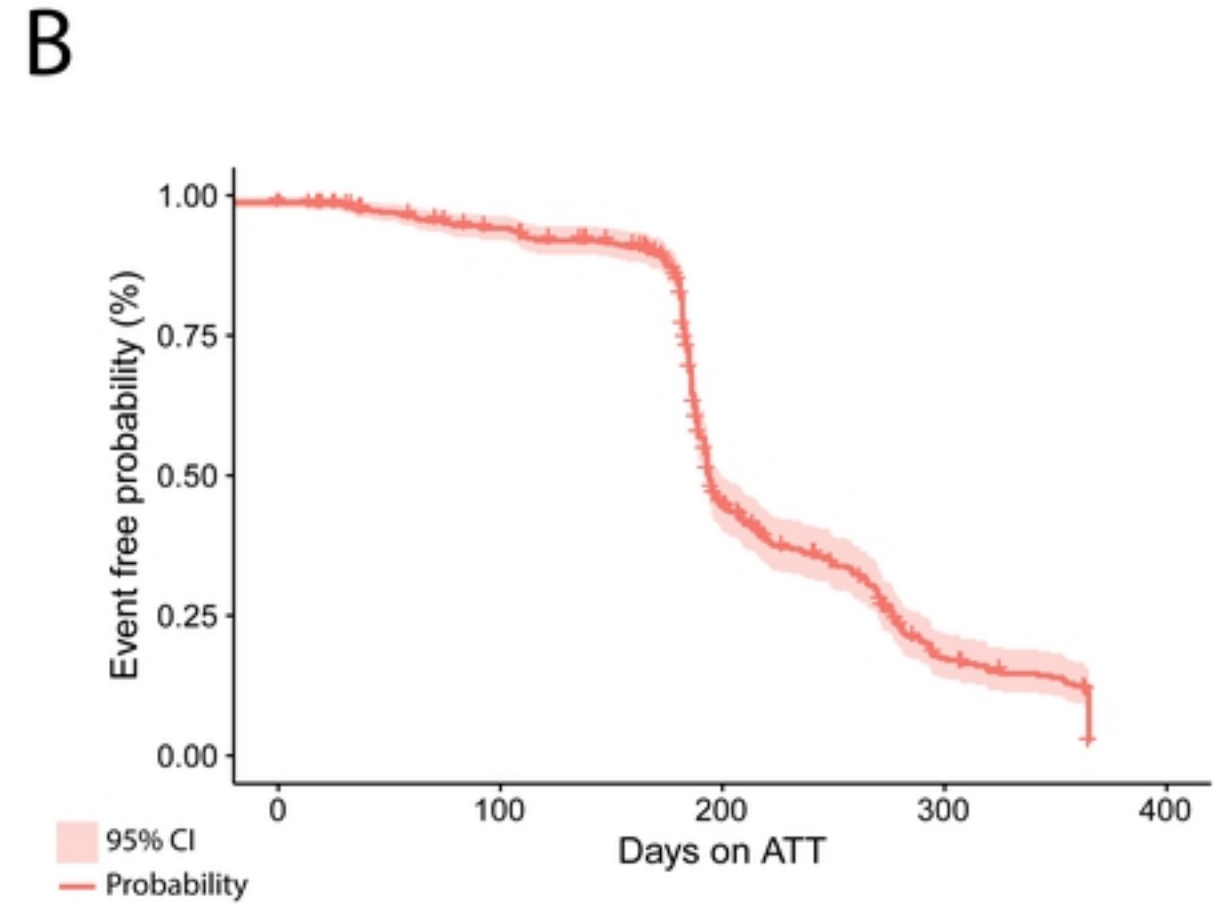

Figure 1

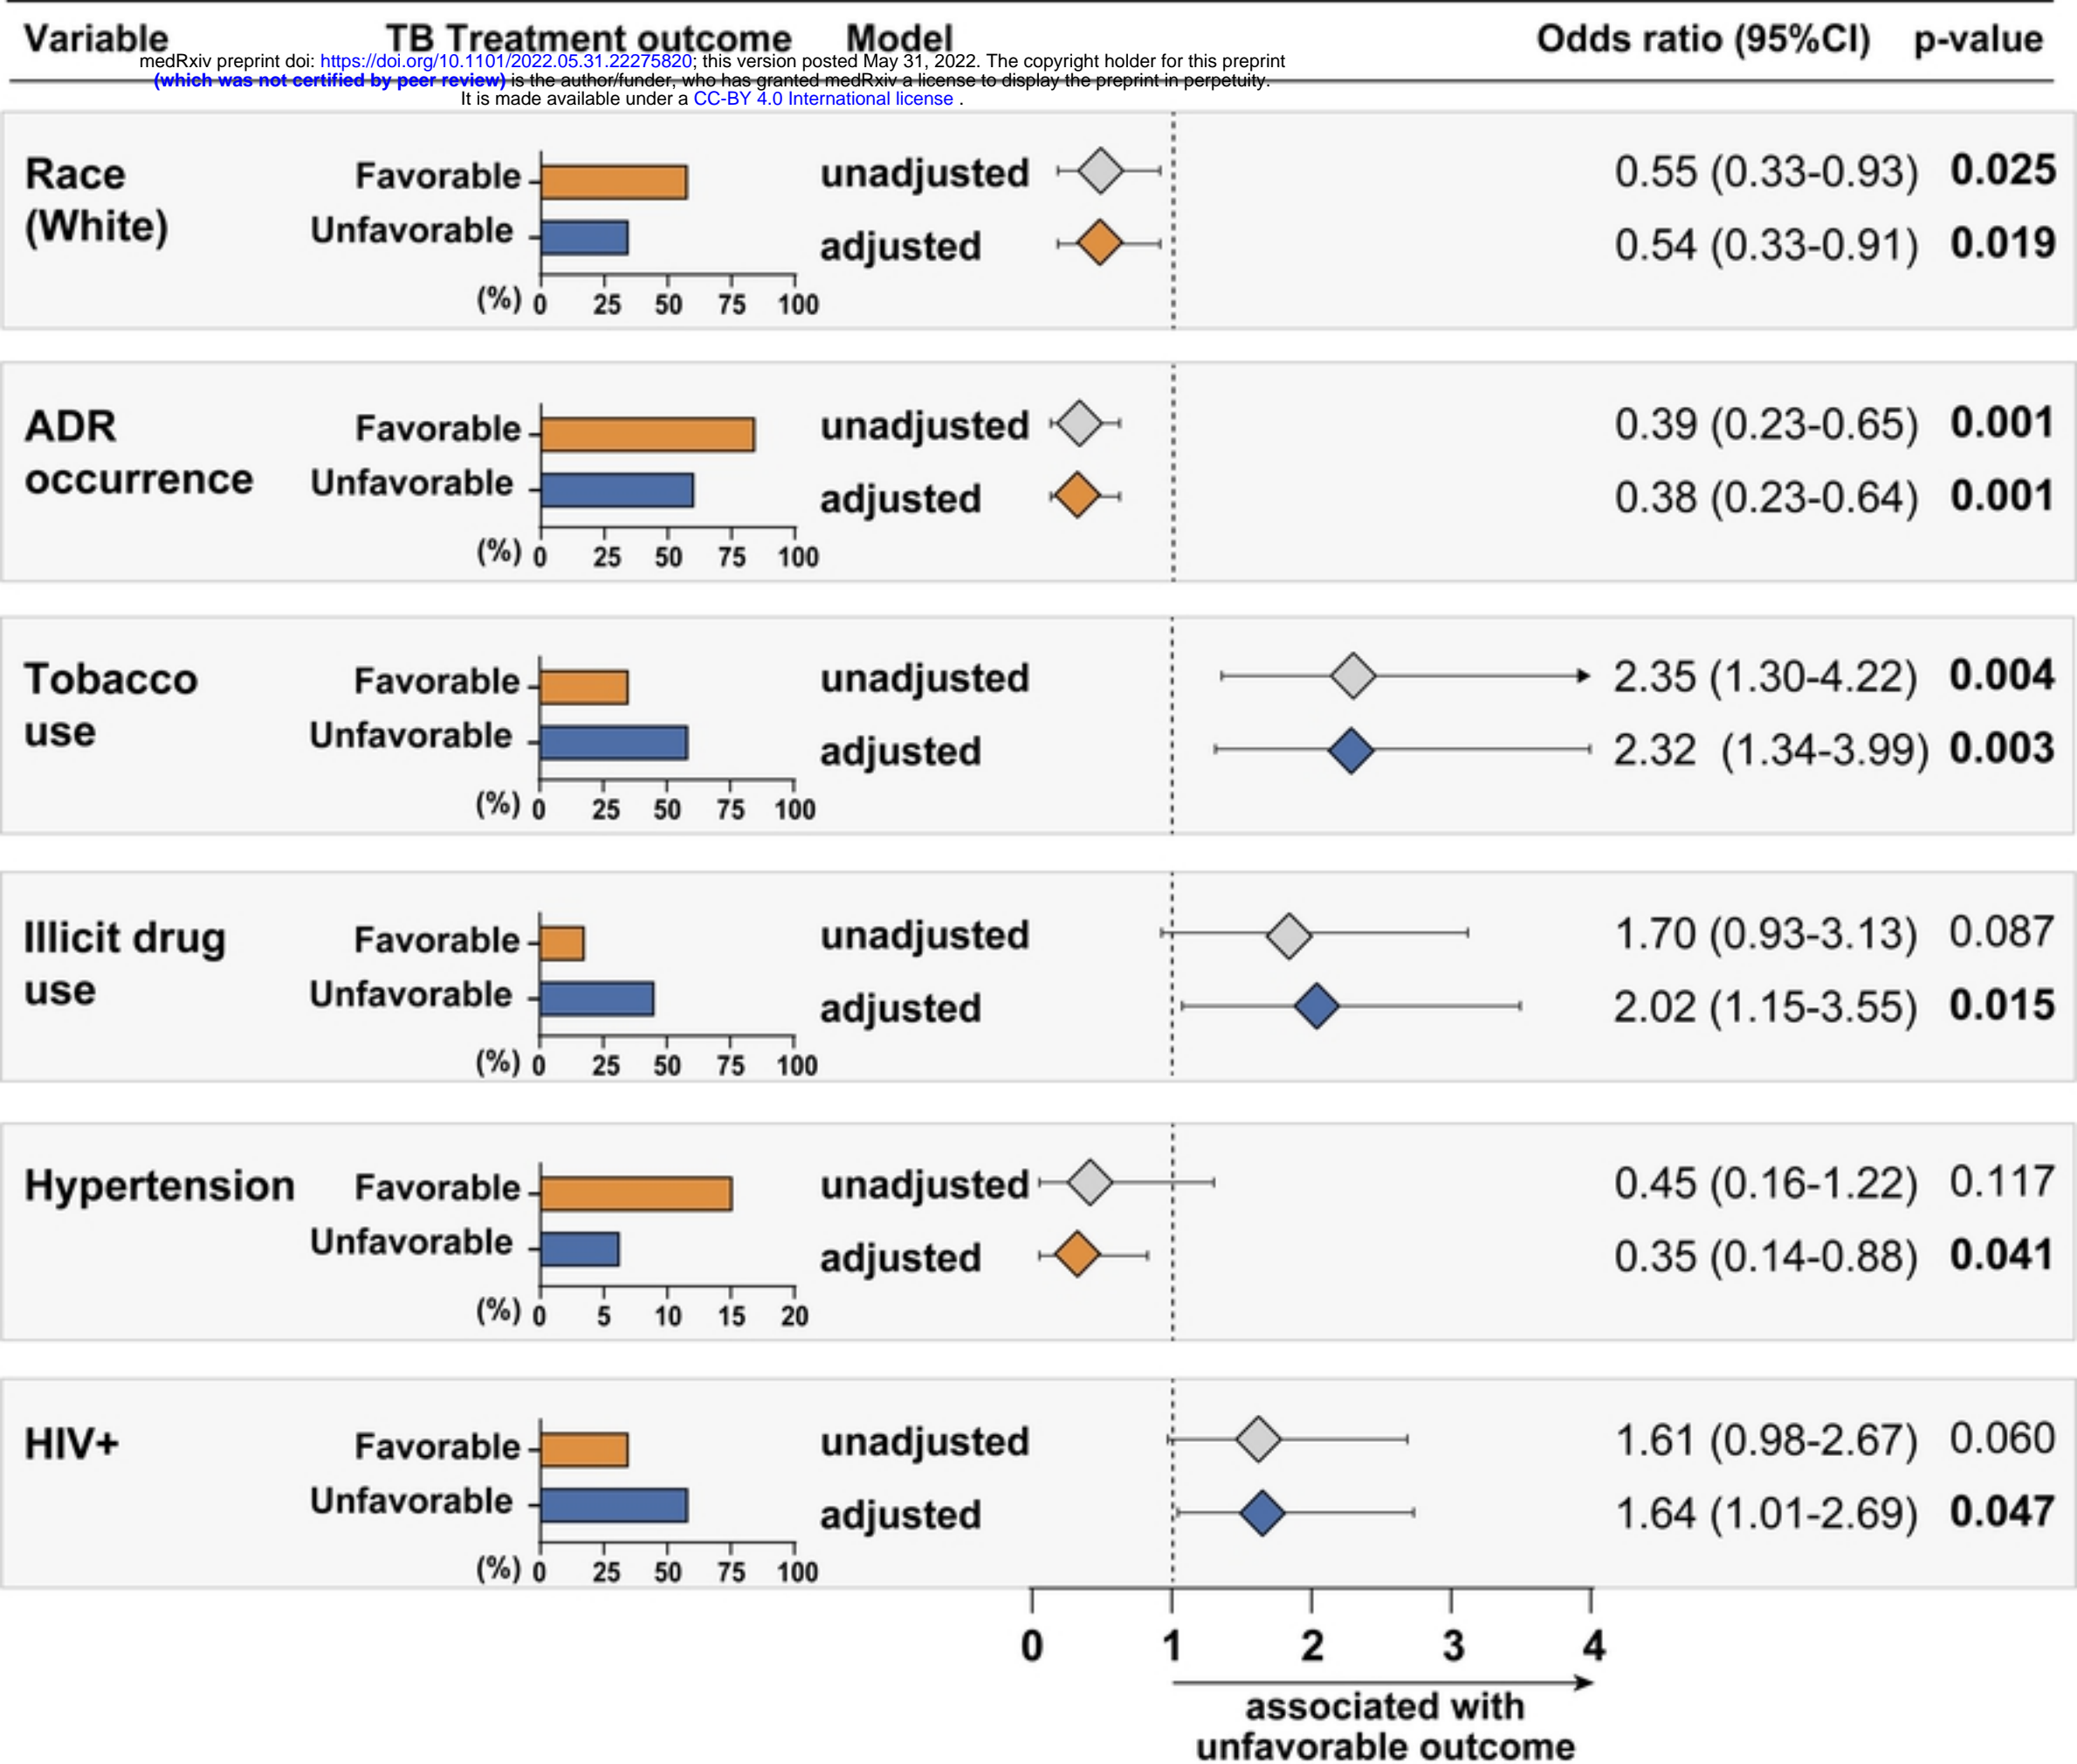

Figure 2
